# Supplementary material for: Iodine-treated heteroatom-doped carbon: conductivity driven electrocatalytic activity
Source: Royal Society of Chemistry journal article supplement (doi:10.1039/c4ta03706e), 2014-09-09
Supplement: c4ta03706e1.pdf [file c4ta03706e1.pdf]

## Supporting Information

### **Iodine-treated heteroatom-doped carbon: conductivity driven electrocatalytic activity**

Kiran Pal Singh, Min Young Song and Jong-Sung Yu\*

Department of Advanced Materials Chemistry, Korea University, 2511 Sejong-ro, Sejong 339-700, Republic of Korea.

**Summary:** This file contains 9 pages, 7 figures and 2 tables

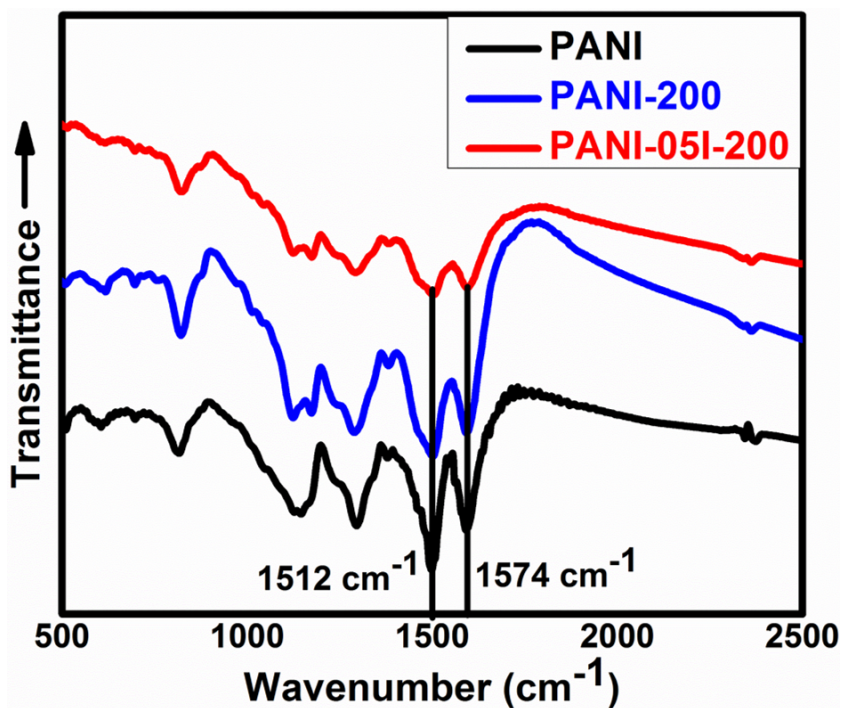

Fig. S1 FTIR spectra of PANI, PANI-200 and PANI-05I-200

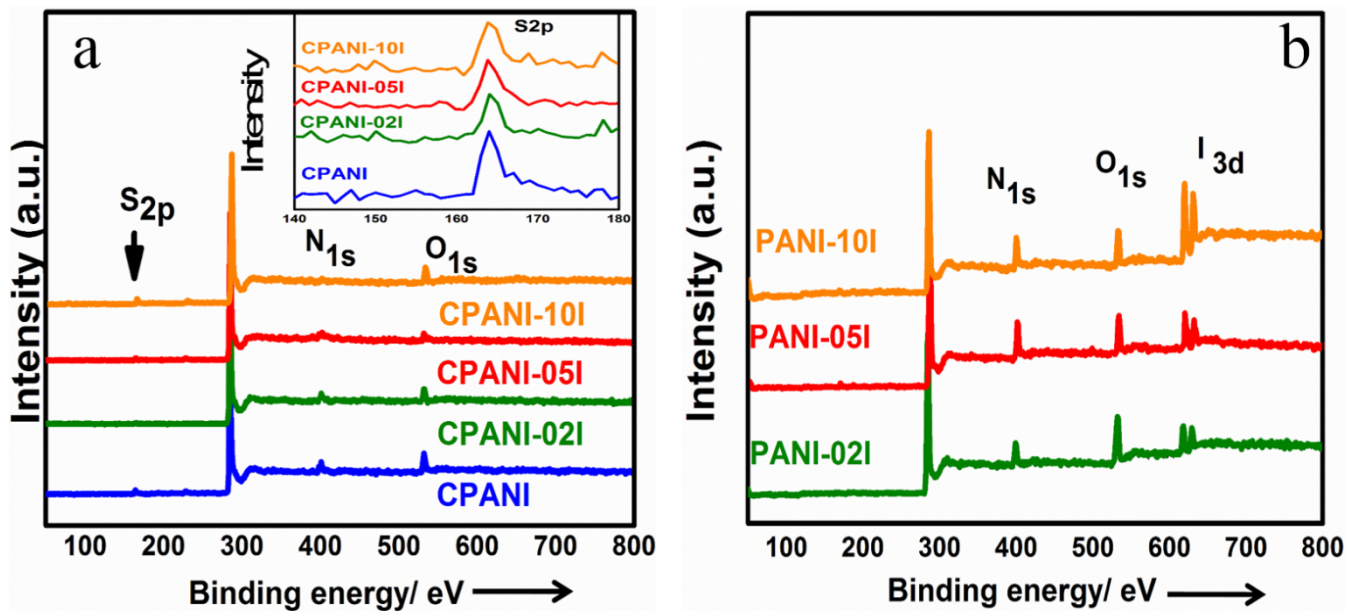

Fig. S2 XPS spectra of a) CPANI, CPANI-02I, CPANI-05I and CPANI-10I and b) PANI, PANI-02I, PANI-05I and PANI-10I.

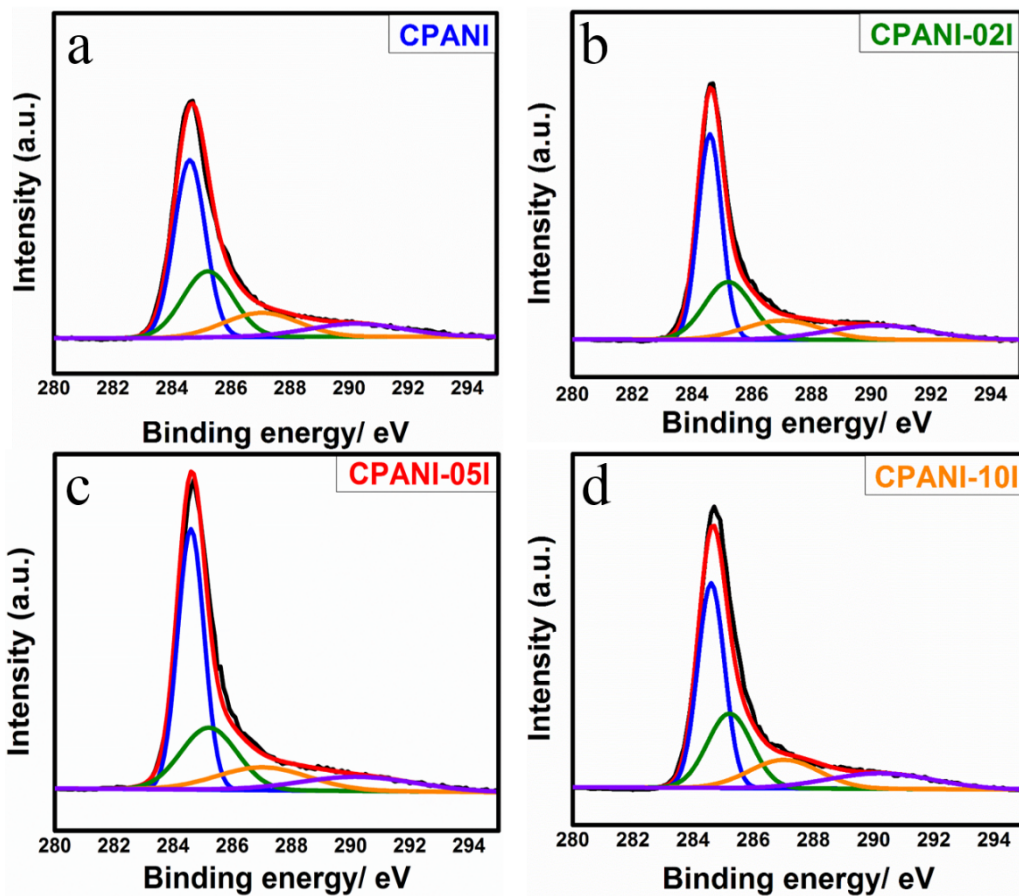

**Fig. S3** Deconvoluted XPS spectra of C 1s for a) CPANI, b) CPANI-02I, C) CPANI-05I and d) CPANI-10I.

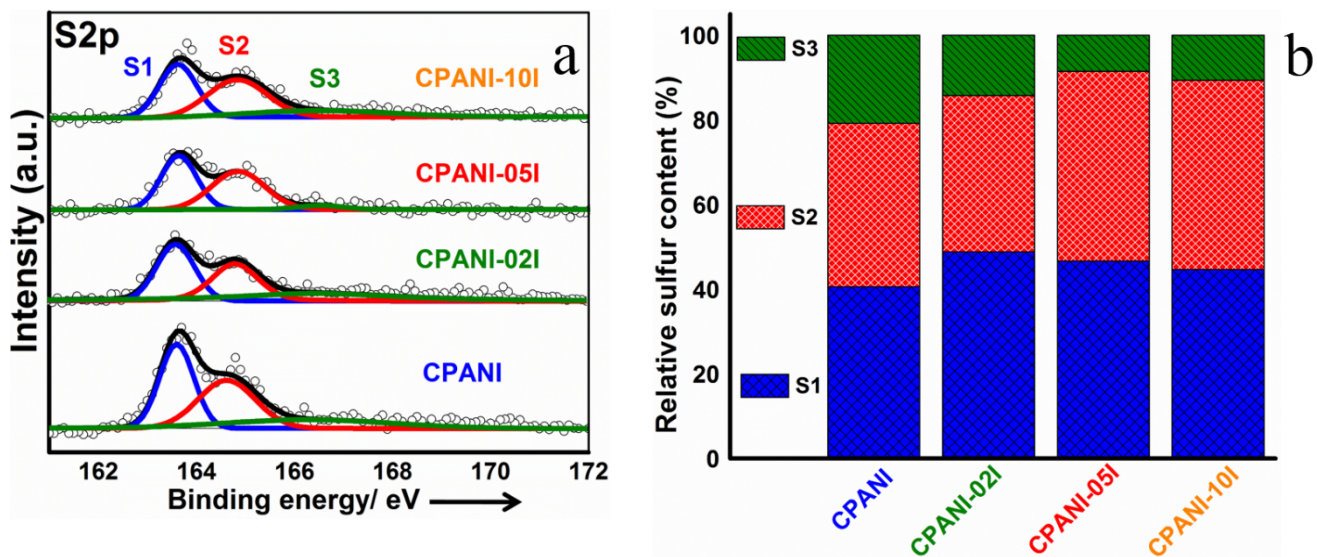

**Fig. S4** (a) Deconvolution of S 2p into three main components, S1: (S P3/2), S2: (S P1/2) and S3: (SOx) and (b) distribution of major components of sulfur present in CPANI, CPANI-02I, CPANI-05I and CPANI-10I.

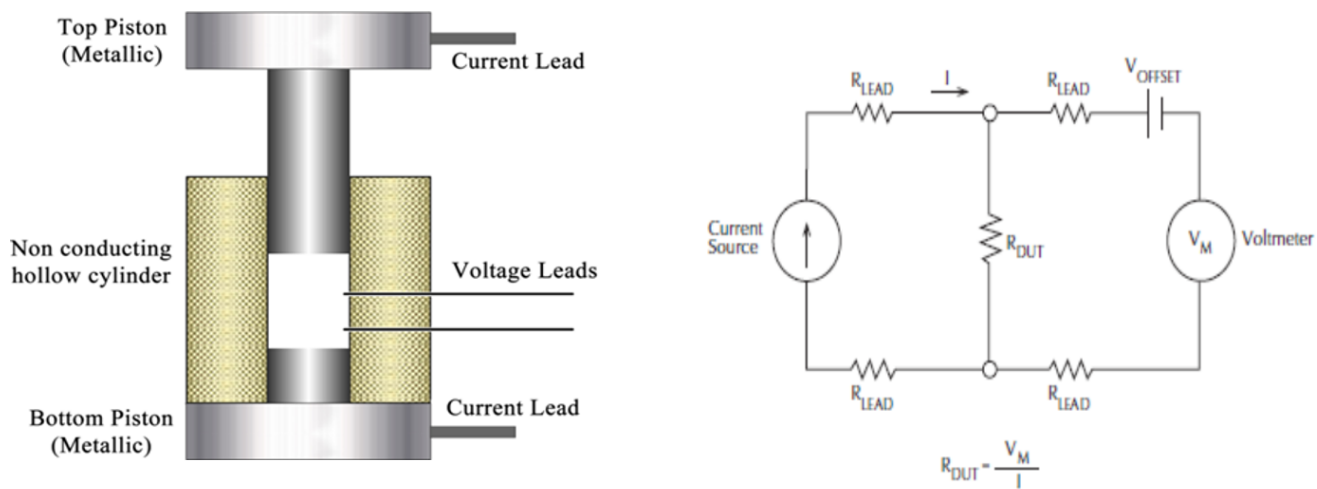

**Fig. S5** Design of four probe apparatus used to measure conductivity of the powder carbon samples and circuit diagram of the resistance measurement technique.



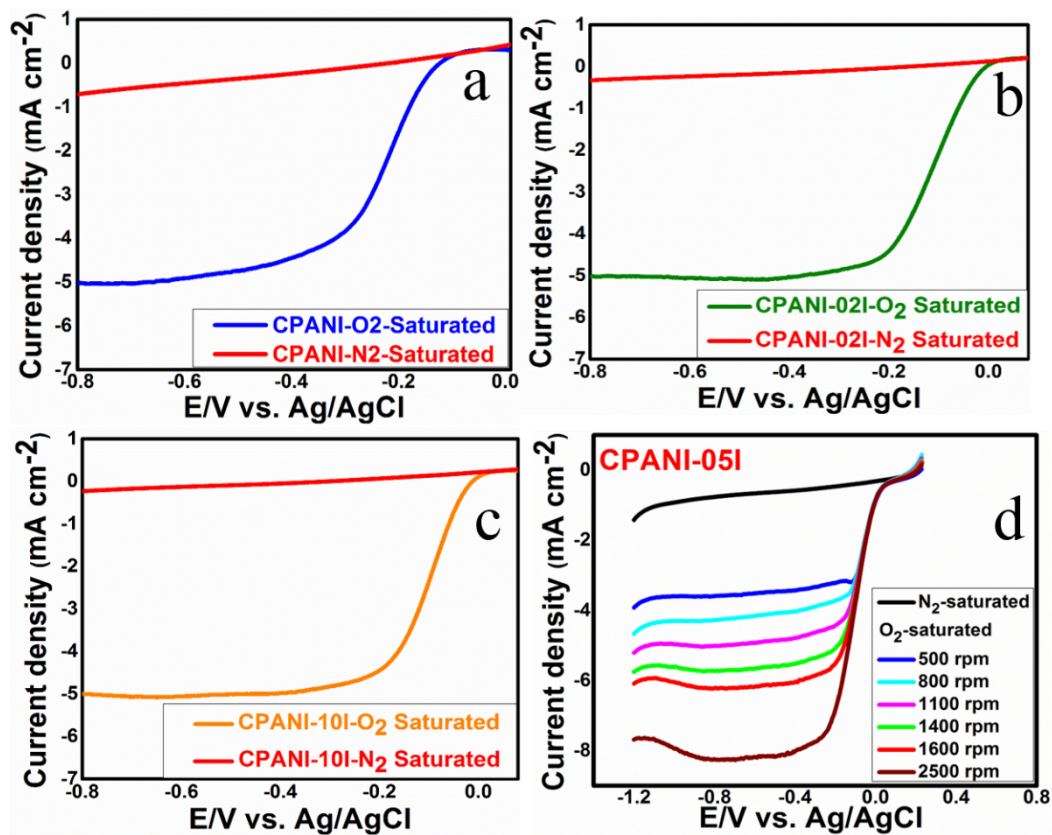

**Fig. S6** Linear sweep voltammetry (LSV) curves of ORR in O<sub>2</sub>- and N<sub>2</sub>-saturated atmosphere at 1600 rpm for (a) CPANI, (b) CPANI-02I and (c) CPANI-10I, and (d) LSV curves of ORR at various rotation rates for CPANI-05I

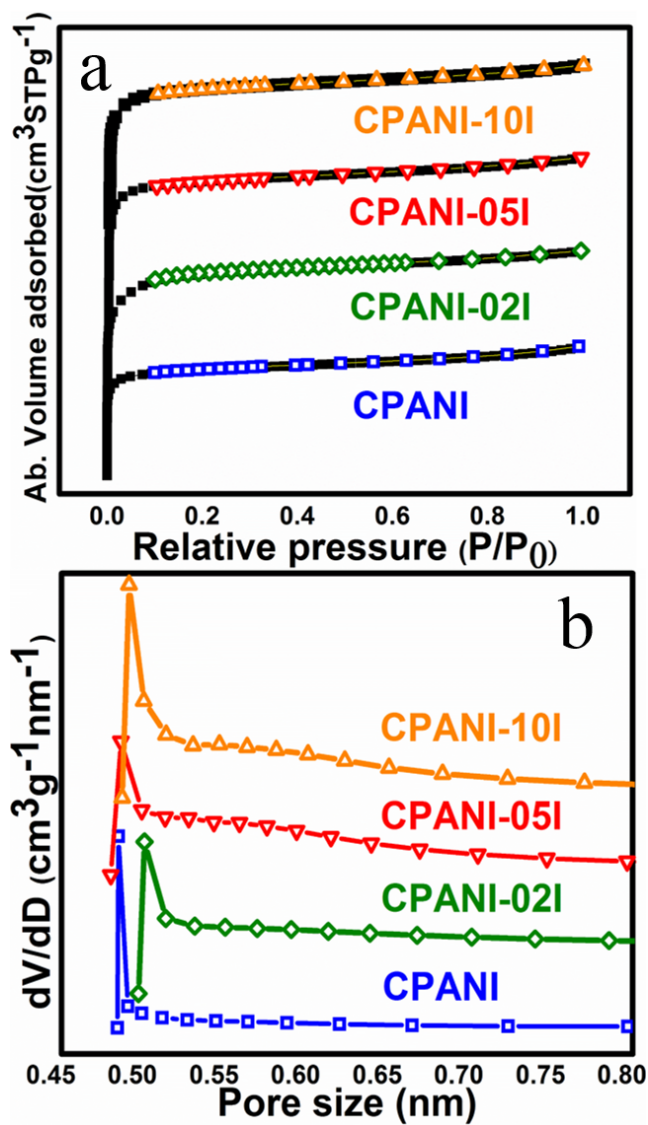

**Fig. S7** (a) Nitrogen adsorption-desorption isotherms and (b) the corresponding pore size distribution curves of CPANI, CPANI-02I, CPANI-05I and CPANI-10I.

**Table S1** Nitrogen sorption and electrochemical conductivity data of untreated CPANI and I-treated CPANI-02I, CPANI-05I and CPANI-10I

| Sample    | Physical characteristics                                 |                                                          |                                                |                                                     |                    |                               |
|-----------|----------------------------------------------------------|----------------------------------------------------------|------------------------------------------------|-----------------------------------------------------|--------------------|-------------------------------|
|           | BET total surface area (m <sup>2</sup> g <sup>-1</sup> ) | Micropore surface area (m <sup>2</sup> g <sup>-1</sup> ) | Pore volume (cm <sup>3</sup> g <sup>-1</sup> ) | Micropore volume (cm <sup>3</sup> g <sup>-1</sup> ) | H-K pore size (nm) | Conductivity (S/cm) at 18 MPa |
| CPANI     | 855                                                      | 811                                                      | 0.38                                           | 0.36                                                | 0.48               | 6.50                          |
| CPANI-02I | 1104                                                     | 1058                                                     | 0.48                                           | 0.42                                                | 0.50               | 14.05                         |
| CPANI-05I | 1130                                                     | 1082                                                     | 0.48                                           | 0.41                                                | 0.48               | 19.77                         |
| CPANI-10I | 1060                                                     | 1011                                                     | 0.40                                           | 0.38                                                | 0.49               | 17.87                         |

**Table S2** Comparison of ORR activities and kinetics of reported heteroatom-doped carbon catalysts with the iodine treated heteroatom-doped catalyst in this work.

| Catalyst                                                   | Preparation method/Pyrolysis temperature                                                                                  | Electrolyte | Onset potential (V vs. Ag/AgCl) | Current density (mA/cm <sup>2</sup> ) | Peak Potential. (V) | Reference |
|------------------------------------------------------------|---------------------------------------------------------------------------------------------------------------------------|-------------|---------------------------------|---------------------------------------|---------------------|-----------|
| I-treated heteroatom-doped carbon                          | Pyrolysis of PANI in presence of iodine at 900 °C                                                                         | 0.1 M KOH   | +0.021                          | 5.71                                  | -0.14               | This work |
| N-doped graphene                                           | Annealing of GO/PANI composite at 1000°C                                                                                  | 0.1 M KOH   | N/A                             | N/A                                   | -0.22               | 1         |
| N-doped graphene                                           | Heat treatment of graphite with 4-aminobenzoic acid and polyphosphoric acid/P <sub>2</sub> O <sub>5</sub> at 170° C       | 0.1 M KOH   | -0.13                           | N/A                                   | N/A                 | 2         |
| Metal-free N-doped carbon aerogels made from ionic liquids | Carbonization of ionic liquid 1-ethyl-3-methylimidazolium dicyanamide mixed with the NaCl/ZnCl <sub>2</sub> at 1000 °C    | 0.1 M KOH   | N/A                             | ~6.0                                  | -0.2                | 3         |
| S-doped graphene                                           | Annealing of GO and benzyl disulfide at 1050° C                                                                           | 0.1 M KOH   | N/A                             | N/A                                   | -0.29               | 4         |
| N-S doped graphene                                         | Annealing of melamine/BDS/GO/SiO <sub>2</sub> mixture at 900°C                                                            | 0.1 M KOH   | -0.06                           | N/A                                   | -0.24               | 5         |
| N-S doped graphene                                         | Dispersion of GO in thiourea solution which is autoclaved at 180° C. After freeze drying no carbonization was carried out | 0.1 M KOH   | -0.15                           | 3.9                                   | -0.36               | 6         |
| N-S doped graphene                                         | GO was heated with 2-aminothiophenol in presence of polyphosphoric acid at 200° C                                         | 0.1 M KOH   | -0.129 <sup>a</sup>             | N/A                                   | -0.40 <sup>a</sup>  | 7         |
| N-doped carbon from ionic liquids and nucleobases          | By heating nonvolatile ionic liquids featuring dicyanamide anions to temperatures of 1000 °C                              | 0.1 M KOH   | 0.035                           | N/A                                   | -0.192              | 8         |
| Edge-halogenated (I) graphene                              | Ball-milling of graphite in the presence of I <sub>2</sub>                                                                | 0.1 M KOH   | -0.14                           | N/A                                   | -0.22               | 9         |



|                              |                                                                                 |           |                    |                  |                    |    |
|------------------------------|---------------------------------------------------------------------------------|-----------|--------------------|------------------|--------------------|----|
| I-doped graphene             | Pyrolysis of GO with I <sub>2</sub> at 1100°C                                   | 0.1 M KOH | -0.08              | N/A              | -0.29              | 10 |
| Fe containing N-doped carbon | Annealing of iron-complex (derived from bidppz and FeSO <sub>4</sub> ) at 800°C | 0.1 M KOH | -0.02 <sup>b</sup> | 6.0 <sup>c</sup> | -0.03 <sup>b</sup> | 11 |

All the SCE<sup>a</sup> and RHE<sup>b</sup> potentials have been converted to the Ag/AgCl potential.

C. The corresponding current densities are estimated from figure in reported literature.

#### References:

1. Z. Lin, G. Waller, Y. Liu, M. Liu and C. P. Wong, *Carbon*, 2013, **53**,130.
2. I. Y. Jeon, D. Yu, S. Y. Bae, H. J. Choi, D. W. Chang, L. Dai and J. B. Baek. *Chem. Mater.*, 2011, **23**, 3987.
3. K. Elumeeva, N. Fechler, T. P. Fellingner and M. Antonietti. *Mater. Horiz.*, 2014, Advance Article.
4. Z. Yang, Z. Yao, G. Li, G. Fang, H. Nie, Z. Liu, X. Zhou, X. Chen and S. Huang. *ACS Nano*, 2012, **1**, 205.
5. J. Liang, Y. Jiao, M. Jaroniec, S. Zhang and S. Z. Qiao, *Angew. Chem. Int. Ed.*, 2012, **51**, 11496.
6. Y. Su, Y. Zhang, X. Zhuang, S. Li, D. Wu, F. Zhang and X. Feng, *Carbon*, 2013, **62**, 296.
7. Z. Zuo, W. Li and A. Manthiram, *J. Mater. Chem. A*, 2013, **1**, 10166.
- 8 W. Yang, T.-P. Fellingner, and M. Antonietti, *J. Am. Chem. Soc.*, 2011, **133**, 206.
9. I. Y. Jeon, H. J. Choi, M. Choi, J. M. Seo, S. M. Jung, M. J. Kim, S. Zhang, L. Zhang, Z. Xia, L. Dai, N. Park and J. B. Baek, *Sci. Rep.*, 2013, **3**, 1810.
10. Z. Yao, H. Nie, Z. Yang, X. Zhou, Z. Liu and S. Huang, *Chem. Commun.*, 2012, **48**, 1027.
11. L. Lin, Q. Zhu and A. W. Xu, *J. Am. Chem. Soc.*, 2014, **134**, 11027.
